# Supplementary material for: Comparing a few SNP calling algorithms using low-coverage sequencing data
Source: Springer Nature journal article supplement (doi:10.1186/1471-2105-14-274), 2013-09-17

**SOAPsnp dbSNPs**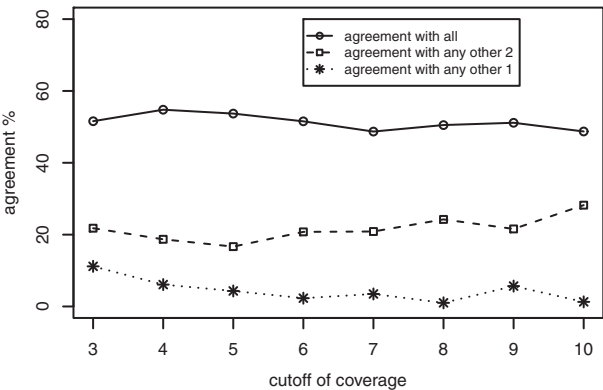**Altas-SNP2 dbSNPs**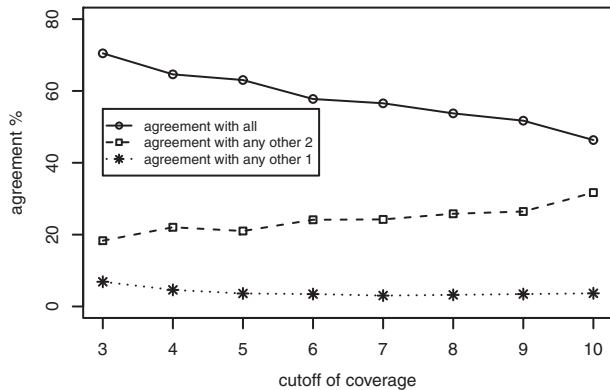**GATK-UGT dbSNPs**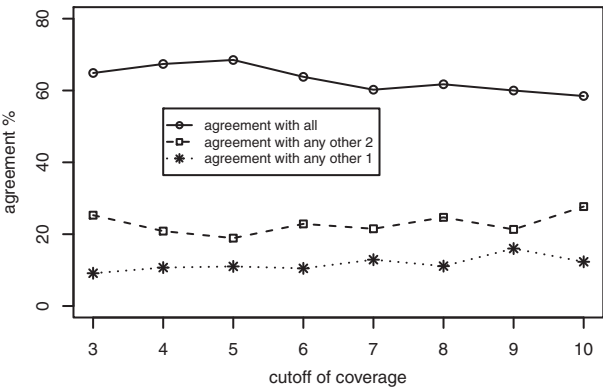**SAMtools dbSNPs**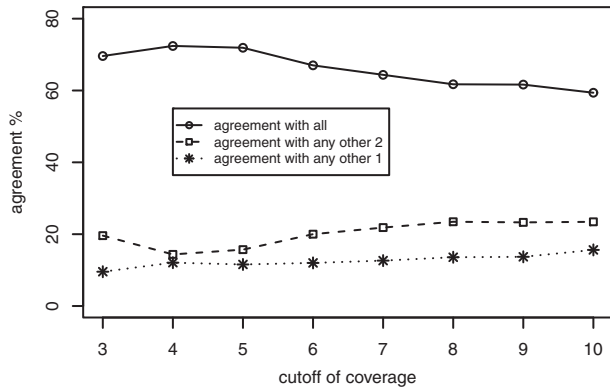

Supplement: 12859_2013_6043_MOESM4_ESM.pdf [file 12859_2013_6043_MOESM4_ESM.pdf]
