# Supplementary material for: Comparing a few SNP calling algorithms using low-coverage sequencing data
Source: Springer Nature journal article supplement (doi:10.1186/1471-2105-14-274), 2013-09-17

**SOAPSnp non-dbSNPs**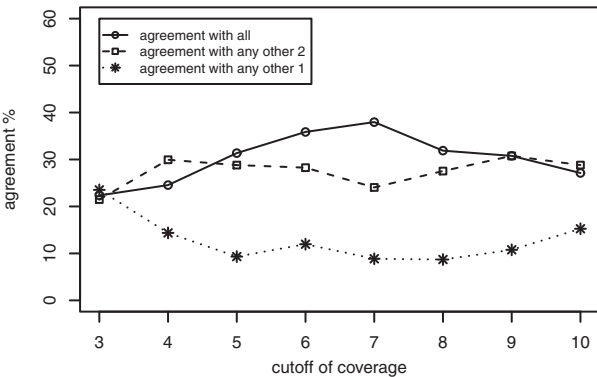**Atlas-SNP2 non-dbSNPs**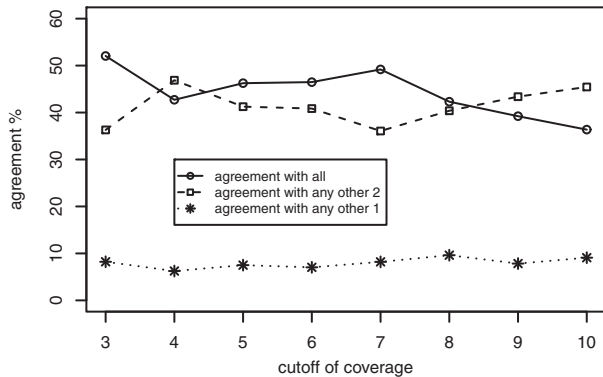**GATK-UGT non-dbSNPs**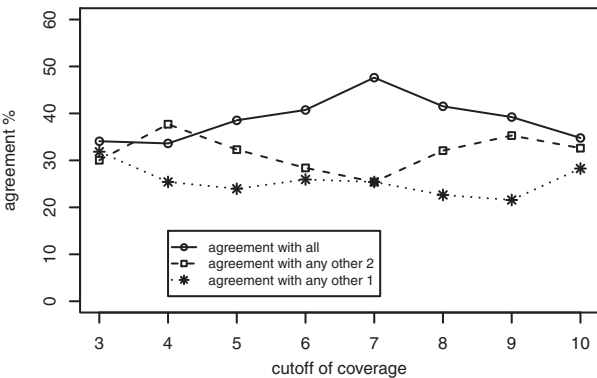**SAMtools non-dbSNPs**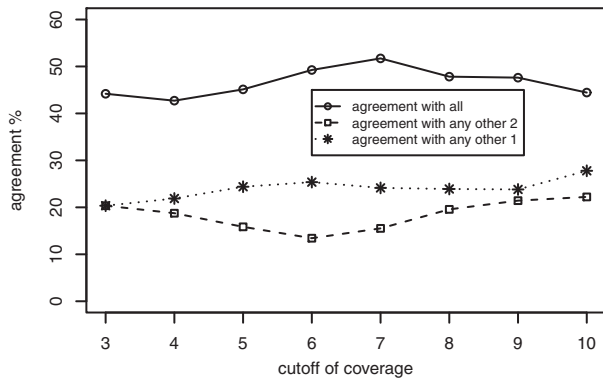

Supplement: 12859_2013_6043_MOESM5_ESM.pdf [file 12859_2013_6043_MOESM5_ESM.pdf]
